# Supplementary material
Source: publisher figshare collection journal article supplement (https://sage.figshare.com/ndownloader/files/18044438)
Supplement: Supplementary file 1 [file 18044438]

Location	ISO_A3
Afghanistan	AFG
Algeria	DZA
Angola	AGO
Azerbaijan	AZE
Bangladesh	BGD
Burundi	BDI
Cameroon	CMR
Central African Republic	CAF
Chad	TCD
China	CHN
Colombia	COL
Congo	COG
DR Congo (Zaire)	COD
Egypt	EGY
Ethiopia	ETH
Georgia	GEO
India	IND
Iran	IRN
Iraq	IRQ
Israel	ISR
Ivory Coast	CIV
Jordan	JOR
Kenya	KEN
Lebanon	LBN
Libya	LBY
Malaysia	MYS
Mali	MLI
Mauritania	MRT
Mozambique	MOZ
Myanmar (Burma)	MMR
Nepal	NPL
Niger	NER
Nigeria	NGA
Pakistan	PAK
Peru	PER
Philippines	PHL
Russia (Soviet Union)	RUS
Rwanda	RWA
Senegal	SEN
Somalia	SOM
South Sudan	SDS
Sri Lanka	LKA
Sudan	SDN
Syria	SYR
Tajikistan	TJK
Thailand	THA
Tunisia	TUN
Turkey	TUR
Uganda	UGA
Ukraine	UKR
United States of America	USA
Yemen (North Yemen)	YEM
